# Supplementary material
Source: PubMed Central journal article supplement (PMC5647239)
Supplement: NIHMS900061-supplement-Supp_Figures.pdf [file NIHMS900061-supplement-Supp_Figures.pdf]

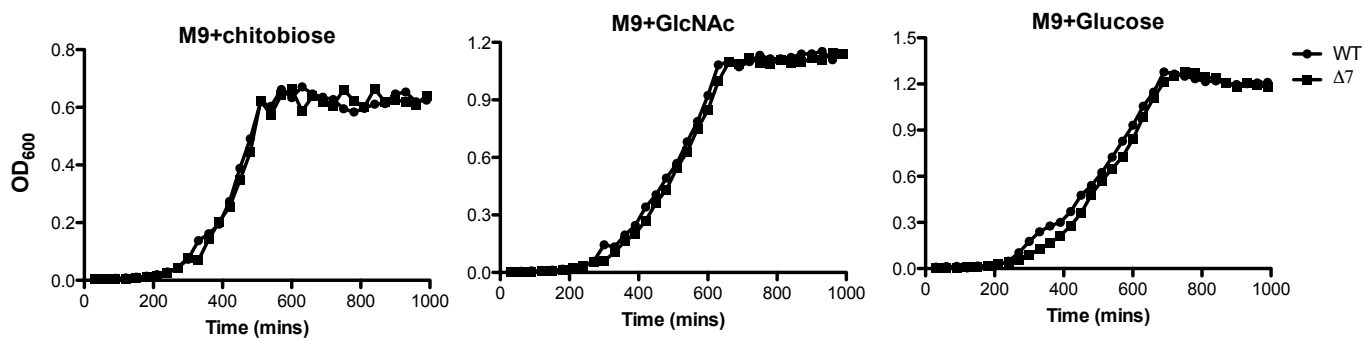

**Fig. S1** – A chitinase deficient strain is still capable of growth on the chitin degradation products chitobiose and GlcNAc. Growth curves of wildtype (black circles) and  $\Delta 7$  chitinase strain (black squares) in M9 minimal medium supplemented with the carbon source indicated above each graph. Data are representative of at least two independent experiments.

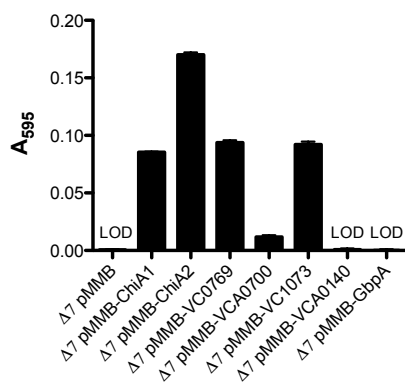

**Fig. S2** – *Five predicted endochitinases have detectable activity.* Endochitinase activity assay of the indicated strains. All strains were incubated with RBB chitin beads in M9+tryptone medium supplemented with carbenicillin 20  $\mu\text{g}/\text{mL}$  and 100  $\mu\text{M}$  IPTG. LOD = limit of detection. Data are the result of at least three independent biological replicates and are shown as the mean  $\pm$  SD.

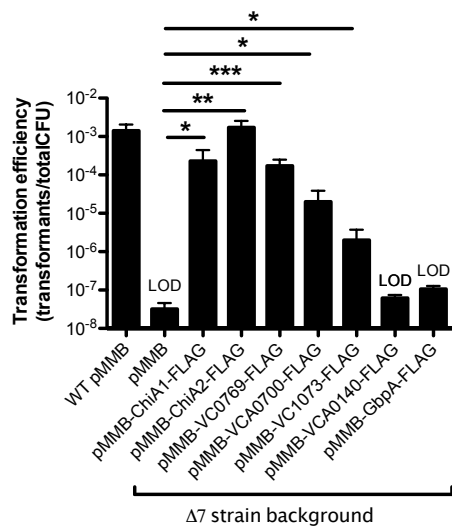

**Fig. S3** – *C-terminally FLAG tagged chitinases are functional*. Natural transformation assay of the indicated strains. All strains were incubated on chitin with Carbenicillin (20 μg/mL) and IPTG (100 μg/mL). Data are from at least three independent biological replicates and shown as the mean ± SD. \* = p<0.05, \*\* = p<0.01, \*\*\* = p<0.001, and LOD = limit of detection. All data are from at least three independent biological replicates and are shown as the mean ± SD.

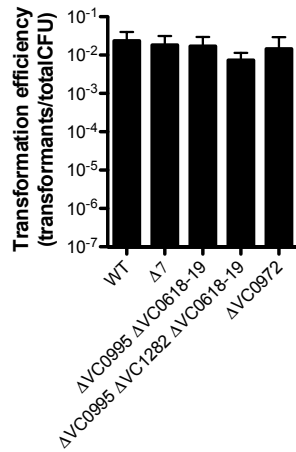

**Fig. S4** – *Ectopic expression of TfoX rescues transformation efficiency of transporter mutants.* Chitin-independent transformation assay of the indicated strains. All strains harbored a pMMB-*tfoX* plasmid and were induced with 100  $\mu$ M IPTG. All data are from at least three independent biological replicates and are shown as the mean  $\pm$  SD.
